# Supplementary material for: Detection and Molecular Diversity of Cryptosporidium spp. and Giardia duodenalis in the Endangered Iberian Lynx (Lynx pardinus), Spain
Source: MDPI journal article supplement (doi:10.3390/ani14020340), 2024-01-22
Supplement: s1 [file s1]

**Table S2.** Oligonucleotides used for the molecular identification and/or characterization of *Cryptosporidium* spp. and *Giardia duodenalis* in the present study.

| Target organism               | Locus           | Oligonucleotide | Sequence (5'–3')              | Reference |
|-------------------------------|-----------------|-----------------|-------------------------------|-----------|
| <i>Cryptosporidium</i> spp.   | <i>ssu</i> rRNA | CR-P1           | CAGGGAGGTAGTGACAAGAA          | [57]      |
|                               |                 | CR-P2           | TCAGCCTTGCGACCATACTC          |           |
|                               |                 | CR-P3           | ATTGGAGGGCAAGTCTGGTG          |           |
|                               |                 | CPB-DIAGR       | TAAGGTGCTGAAGGAGTAAGG         |           |
| <i>Cryptosporidium parvum</i> | <i>gp60</i>     | AL 3531         | ATAGTCTCCGCTGTATTC            | [58]      |
|                               |                 | AL 3535         | GGAAGGAACGATGTATCT            |           |
|                               |                 | AL 3532         | TCCGCTGTATTCTCAGCC            |           |
|                               |                 | AL 3534         | GCAGAGGAACCAGCATC             |           |
| <i>Giardia duodenalis</i>     | <i>ssu</i> rRNA | Probe           | FAM–CCCGCGGCGGTCCCTGCTAG–BHQ1 | [59]      |
|                               |                 | Gd-80F          | GACGGCTCAGGACAACGGTT          |           |
|                               |                 | Gd-127R         | TTGCCAGCGGTGTCCG              |           |
|                               | <i>ssu</i> rRNA | Gia2029         | AAGTGTGGTGCAGACGGA CT C       | [60]      |
|                               |                 | Gia2150c        | CTGCTGCCGTCCTTGGATGT          |           |
|                               |                 | RH11            | CATCCGGTCGATCCTGCC            |           |
|                               | <i>gdh</i>      | RH4             | AGTCGAACCTGATTCTCCGCCAGG      | [61]      |
|                               |                 | GDHeF           | TCAACGYAAYCGYGGYTTCCGT        |           |
|                               |                 | GDHiF           | CAGTACACCTCYGCTCTCGG          |           |
|                               | <i>bg</i>       | GDHiR           | GTTRTCCTTGACATCTCC            | [62]      |
|                               |                 | G7_F            | AAGCCCGACGACCTCACCCGCAGTGC    |           |
|                               |                 | G759_R          | GAGGCCGCCCTGGATCTTCGAGACGAC   |           |
|                               | <i>tpi</i>      | G99_F           | GAACGAACGAGATCGAGGTCCG        | [63]      |
|                               |                 | G609_R          | CTCGACGAGCTTCGTGTT            |           |
|                               |                 | AL3543          | AAATATGCCTGCTCGTCG            |           |
|                               | <i>tpi</i>      | AL3546          | CAAACCTTITCCGCAAACC           | [64]      |
|                               |                 | AL3544          | CCCTTCATCGGIGGTA ACT T        |           |
|                               |                 | AL3545          | GTGGCCACCACICCCGTGCC          |           |

*bg*:  $\beta$ -giardin; *gdh*: Glutamate dehydrogenase; *ssu* rRNA: Small subunit ribosomal RNA; *tpi*: Triose phosphate isomerase.
