# Supplementary material for: Detection and Molecular Diversity of Cryptosporidium spp. and Giardia duodenalis in the Endangered Iberian Lynx (Lynx pardinus), Spain
Source: MDPI journal article supplement (doi:10.3390/ani14020340), 2024-01-22
Supplement: s1 [file s1]

**Table S1.** PCR cycling conditions used for the molecular identification and/or characterization of *Cryptosporidium* spp. and *Giardia duodenalis* in the present study.

| Target pathogen             | Locus           | Temperature and time |              |               |             | No. cycles | Final extension | Reference |
|-----------------------------|-----------------|----------------------|--------------|---------------|-------------|------------|-----------------|-----------|
|                             |                 | Initial denaturation | Denaturation | Annealing     | Extension   |            |                 |           |
| <i>Cryptosporidium</i> spp. | <i>ssu</i> rRNA | 94 °C 3 min          | 94 °C 40 s   | 50 °C 40 s    | 72 °C 1 min | 35         | 72 °C 10 min    | [57]      |
| <i>Cryptosporidium</i> spp. | <i>gp60</i>     | 94 °C 5 min          | 94 °C 45 s   | 59 °C 45 s    | 72 °C 1 min | 35         | 72 °C 10 min    | [58]      |
| <i>Giardia duodenalis</i>   | <i>ssu</i> rRNA | 95 °C 15 min         | 95 °C 15 s   | 60 °C 1 min   | 72 °C 30 s  | 45         | –               | [59]      |
|                             | <i>ssu</i> rRNA | 95 °C 2 min          | 95 °C 45 s   | 58/55 °C 30 s | 72 °C 45 s  | 35         | 72 °C 4 min     | [60]      |
|                             | <i>gdh</i>      | 95 °C 3 min          | 95 °C 30 s   | 55 °C 30 s    | 72 °C 1 min | 35         | 72 °C 7 min     | [62]      |
|                             | <i>bg</i>       | 95 °C 7 min          | 95 °C 30 s   | 65/55 °C 30 s | 72 °C 1 min | 35         | 72 °C 7 min     | [63]      |
|                             | <i>tpi</i>      | 94 °C 5 min          | 94 °C 45 s   | 50 °C 45 s    | 72 °C 1 min | 35         | 72 °C 10 min    | [64]      |

*bg*:  $\beta$ -giardin; *gdh*: Glutamate dehydrogenase; *gp60*: 60 kDa glycoprotein; *ssu* rRNA: Small subunit ribosomal RNA; *tpi*: Triose phosphate isomerase.
